# Supplementary material for: A Surrogate Based Optimization Framework to analyse Stall Induced Vibrations
Source: Copernicus journal article supplement (doi:10.5194/wes-2022-79), 2022-09-01
Supplement: Supplementary file [file wes-2022-79-RC1-supplement.pdf]

Manuscript ID: WES-2022-79

Title: A Surrogate Based Optimization Framework to Analyze Stall Induced Vibrations

1. Comments

- The authors proposed a surrogate-based optimization framework. However, there is nothing new in the framework. All the strategies used in the frame are already available. So, it seems to the reviewer that there is no academic novelty in the manuscript at least regarding surrogate aspect.
- The manuscript title implies that the authors applied the framework for optimization. However, I can't find much about the optimization results obtained applying the proposed framework.
- It is not well explained why the surrogate approach is necessary for the given problem. At least, the authors should explain the computer simulation time and compare the total computation time with and without using the surrogate model for the given problem.

2. Conclusion and Suggestion

The paper is not recommended for publication in its present form.
